# Supplementary material for: Rapid template-free synthesis of an air-stable hierarchical copper nanoassembly and its use as a reusable catalyst for 4-nitrophenol reduction
Source: Royal Society of Chemistry journal article supplement (doi:10.1039/c5ra16644f), 2015-01-01
Supplement: c5ra16644f1.pdf [file c5ra16644f1.pdf]

## Supporting Information

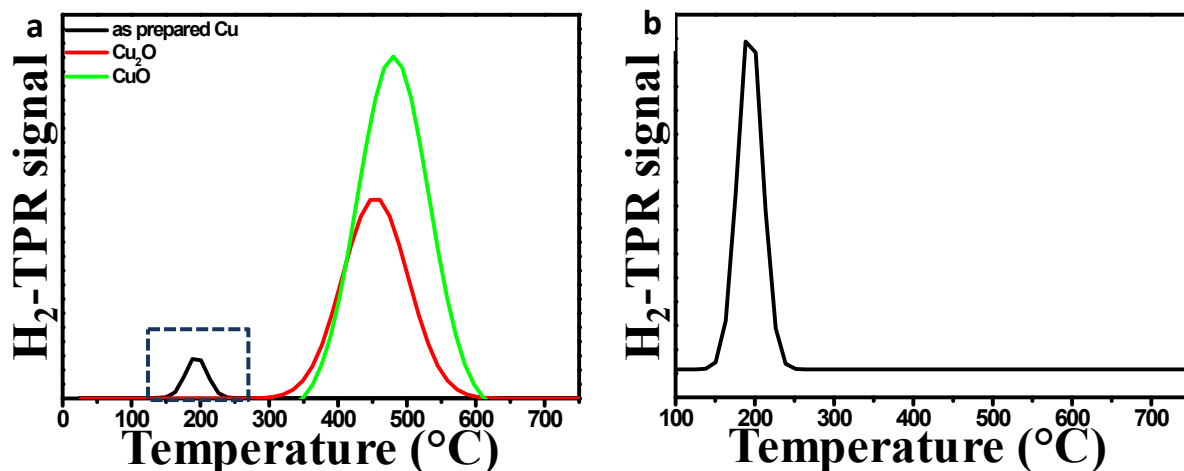

**Fig. S1:** H<sub>2</sub>-TPR profiles of (a) as-prepared Cu and commercial Cu<sub>2</sub>O, CuO as reference materials (b) High magnification H<sub>2</sub>-TPR profiles for as-prepared Cu.

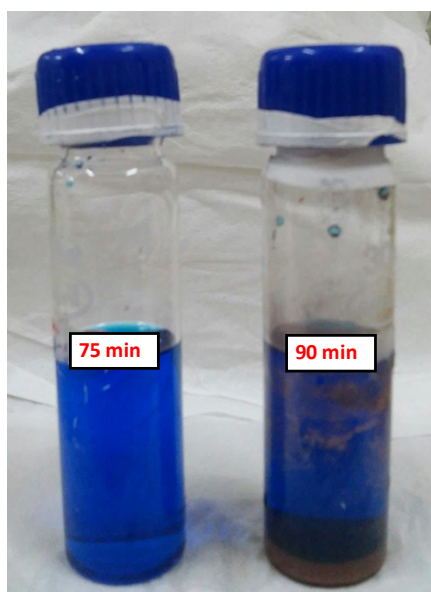

**Fig. S2:** Optical images of the reactions for 75 and 90 min, indicating no Cu particles are formed (bluish colored solution) at 75 min of reaction.

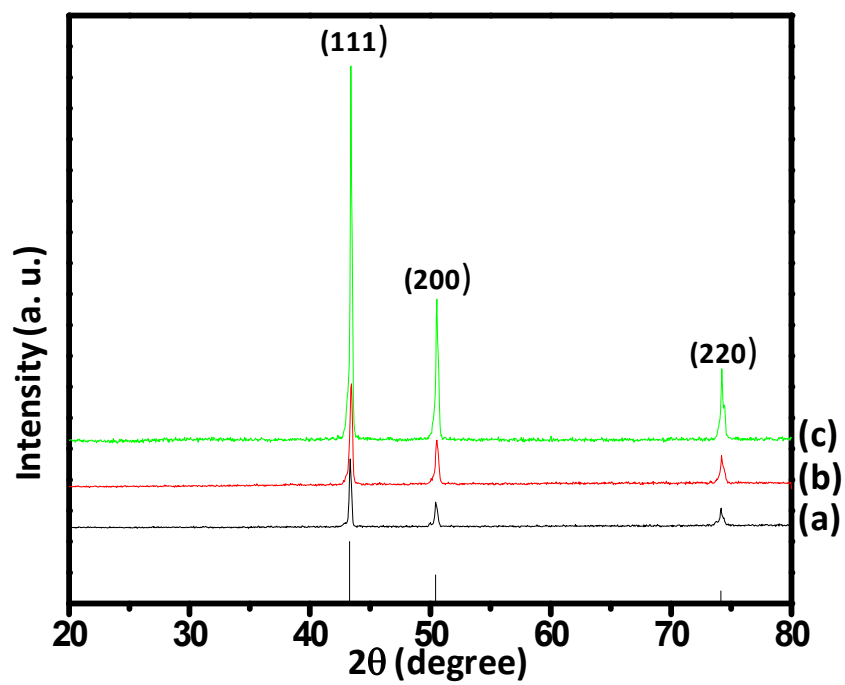

**Fig. S3:** XRD patterns of the as-prepared samples synthesized at 150°C for (a) 90 min, (b) 100 min and (c) 110 min.

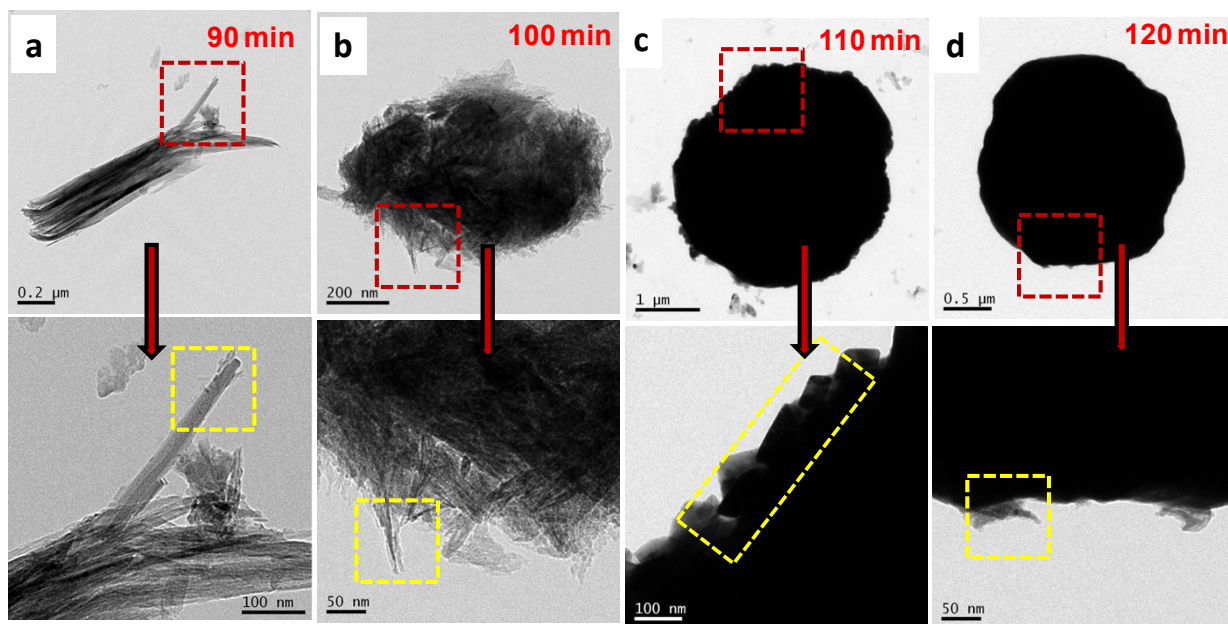

**Fig. S4:** TEM images showing how the nanorod-like copper particles further self-assembled to each other forming copper microspheroid with increase in reaction time from 90 to 100-120 min.

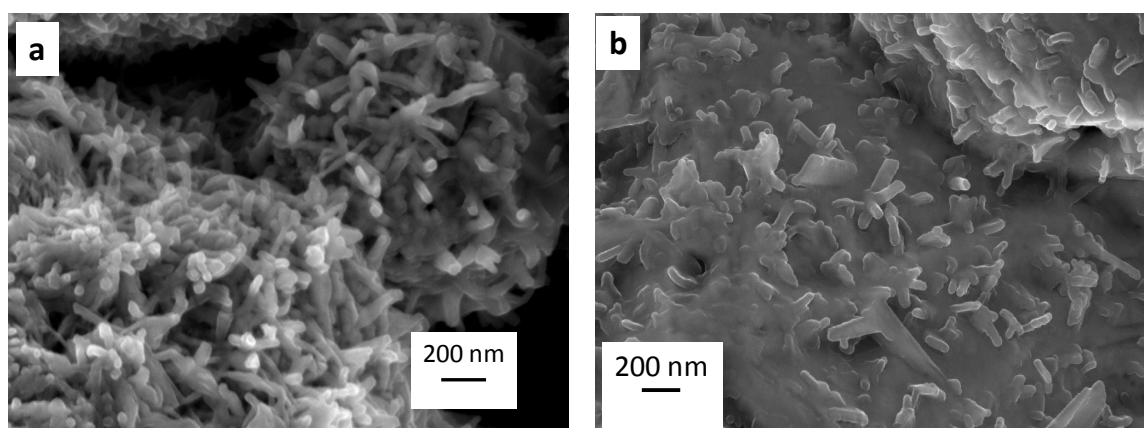

**Fig. S5:** FESEM images of the as-prepared Cu nanorod assembly synthesized at 150°C for (a) 100 min and (b) 120 min

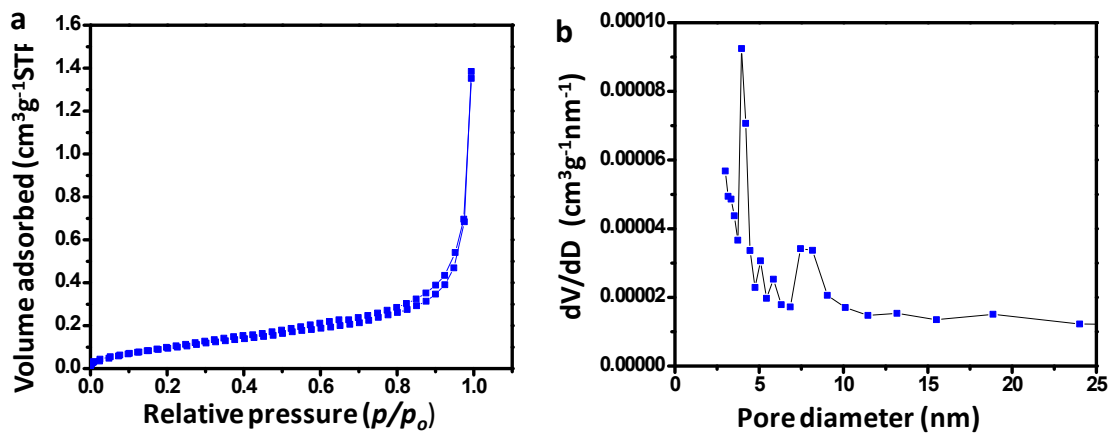

**Fig. S6:** (a) N<sub>2</sub> adsorption-desorption isotherms and (b) pore size distributions of the as-prepared samples synthesized at 150°C for 120 min

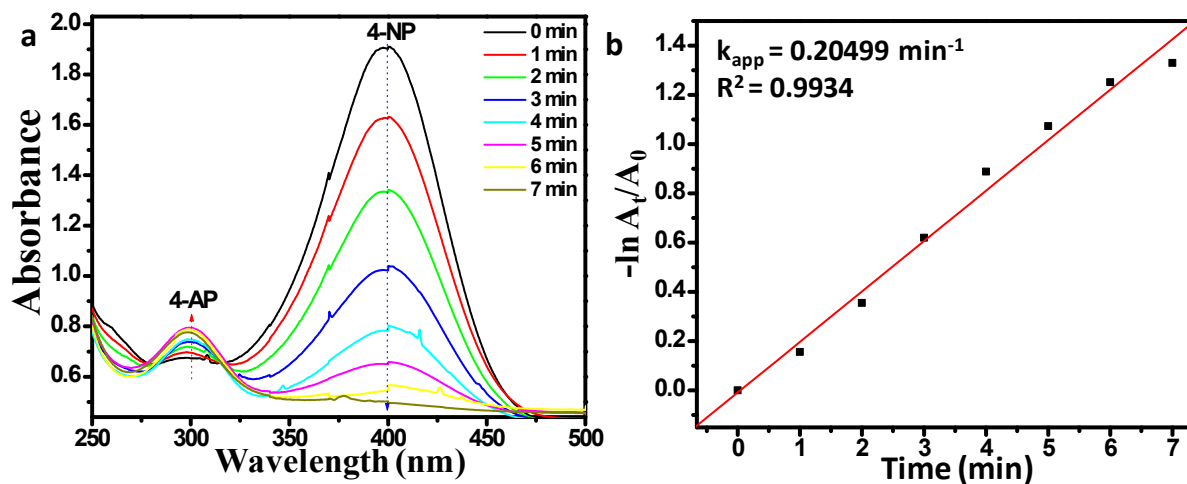

**Fig. S7:** (a) UV-Vis spectra for the reduction of 4-NP with 2 mg of Cu nanoassembly as catalyst, (b) pseudo-first order plot  $-\ln A_t/A_0$  (Abs. intensity at 400 nm) Vs. time with apparent rate constant value 0.20499 min<sup>-1</sup>

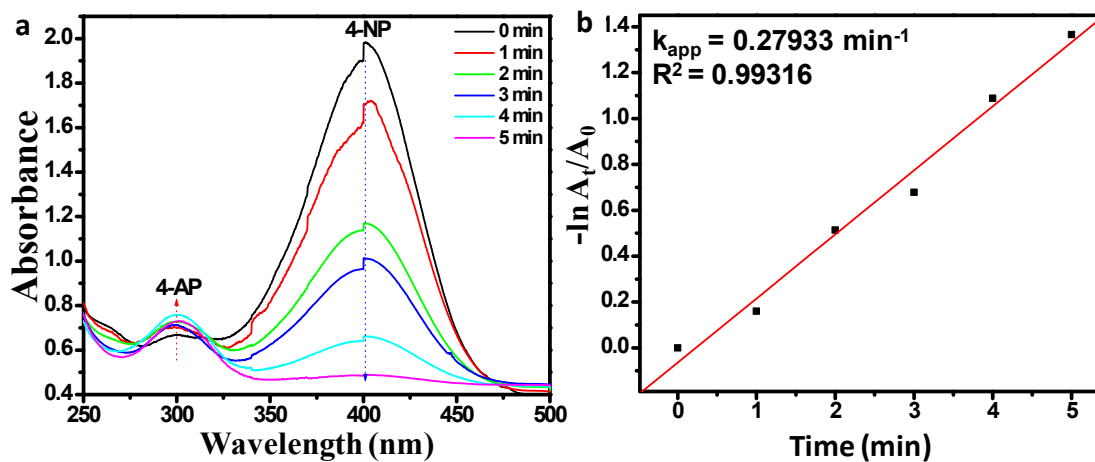

**Fig. S8:** (a) UV-Vis spectra for the reduction of 4-NP with 3 mg of Cu nanoassembly as catalyst, (b) pseudo-first order plot  $-\ln A_t/A_0$  (Abs. intensity at 400 nm) Vs. time with apparent rate constant value  $0.27933 \text{ min}^{-1}$ .

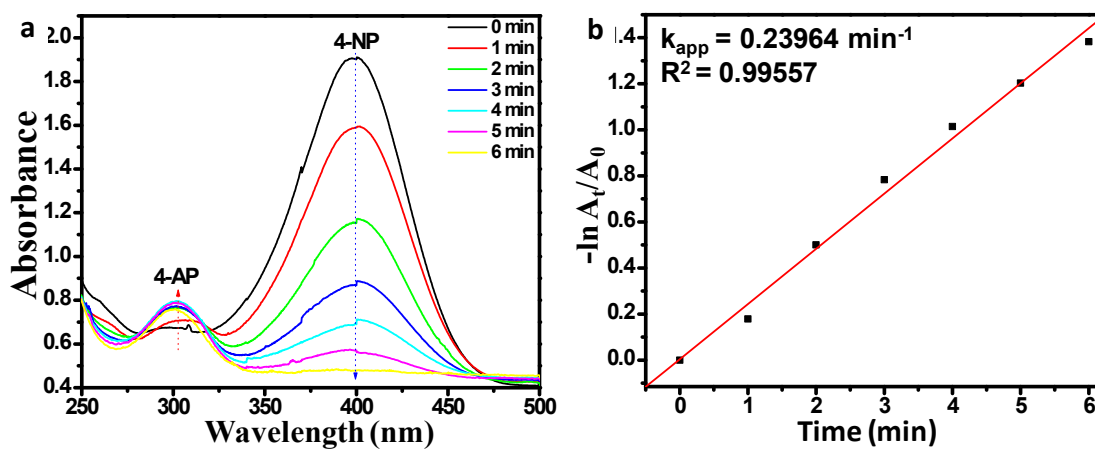

**Fig. S9:** (a) UV-Vis spectra for the reduction of 4-NP with 4 mg of Cu nanoassembly as catalyst, (b) pseudo-first order plot  $-\ln A_t/A_0$  (Abs. intensity at 400 nm) Vs. time with apparent rate constant value  $0.23964 \text{ min}^{-1}$ .

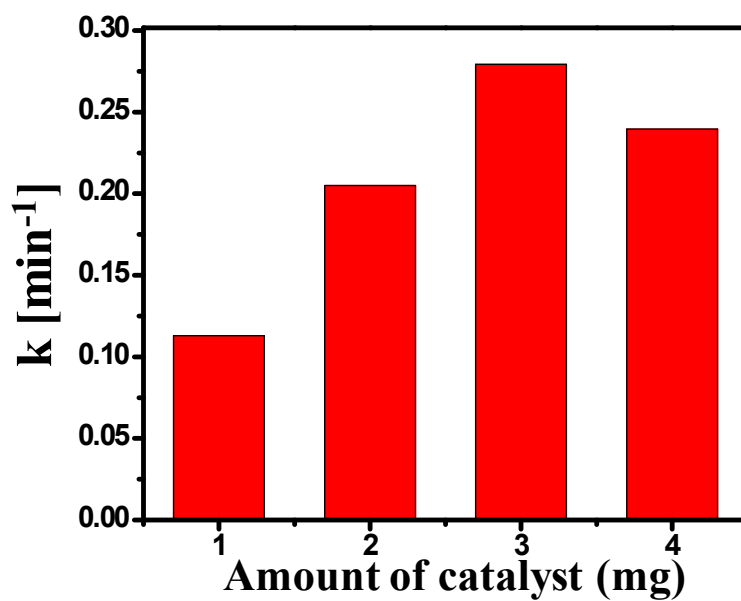

Fig. S10: Change in apparent rate constant with different amount of Cu- catalysts

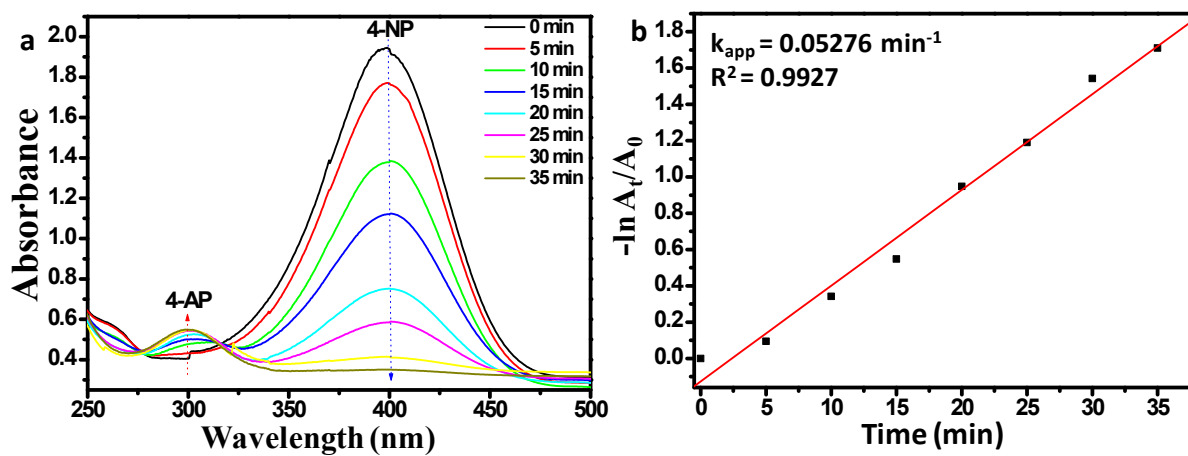

Fig. 11: (a) UV-Vis spectra for the reduction of 4-NP with 1 mg of reference Cu<sub>2</sub>O as catalyst, (b) pseudo-first order plot  $-\ln A_t/A_0$  (Abs. intensity at 400 nm) Vs. time.

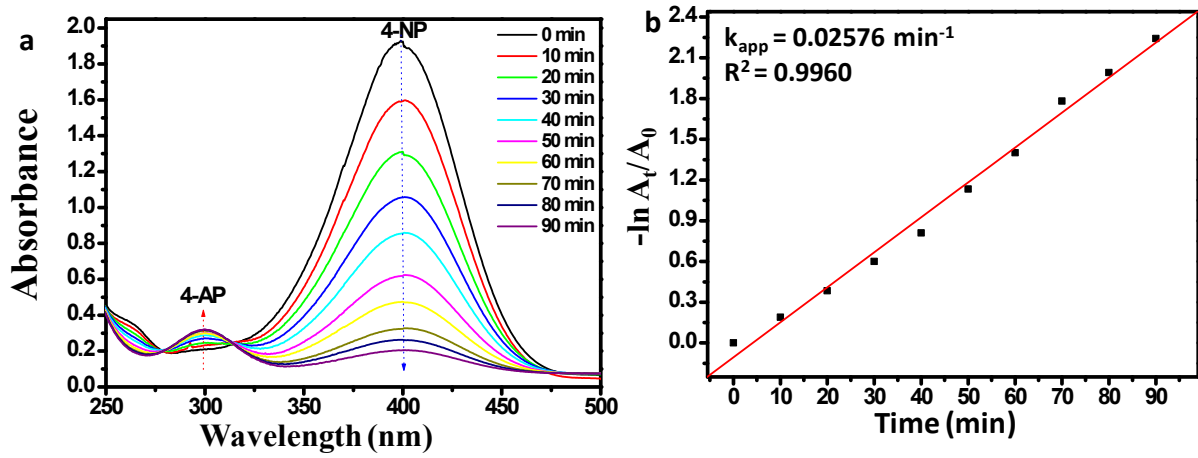

**Fig. 12:** (a) UV-Vis spectra for the reduction of 4-NP with 1 mg of reference CuO as catalyst, (b) pseudo-first order plot  $-\ln A_t/A_0$  (Abs. intensity at 400 nm) Vs. time.

**Table S1. Comparison of rate constant (k) and activity parameter ( $\kappa$ ) of as-prepared Cu with other catalysts for 4-NP reduction.**

| Catalysts                   | k (min <sup>-1</sup> ) | $\kappa$ (min <sup>-1</sup> g <sup>-1</sup> )* | References |
|-----------------------------|------------------------|------------------------------------------------|------------|
| CuNP aggregates             | 0.0952                 | 7.62                                           | 23         |
| Spherical Cu <sub>2</sub> O | 0.1023                 | 102.3                                          | 48         |
| CuO                         | 0.0876                 | 87.6                                           | 48         |
| Conventional CuO            | 1.14                   | 11.4                                           | 49         |
| Coral like Ag-dendrite      | 0.3114                 | 77.85                                          | 50         |
| Spherical Ag                | 0.0218                 | 5.46                                           | 50         |
| Ag-NP/C composite           | 0.1014                 | 101.4                                          | 51         |
| Spherical Ni                | 0.162                  | 54                                             | 52         |
| RANEY® Ni                   | 0.0192                 | 6.4                                            | 52         |
| [Au@Ag] MOF                 | 0.2982                 | 86.18                                          | 53         |
| Cu spheroid                 | 0.11300                | 113.0                                          | This work  |

\*Rate constant per unit mass of Catalyst.

**Table S2. Comparison of rate constant (k) and activity parameter ( $\kappa$ ) of as-prepared Cu with reference Cu<sub>2</sub>O and CuO for 4-NP reduction.**

| Catalysts                           | k (min <sup>-1</sup> ) | $\kappa$ (min <sup>-1</sup> g <sup>-1</sup> )* | Time (min) |
|-------------------------------------|------------------------|------------------------------------------------|------------|
| As-prepared Cu                      | 0.11300                | 113.0                                          | 22         |
| Cu <sub>2</sub> O (Reference oxide) | 0.05276                | 52.76                                          | 35         |
| CuO (Reference oxide)               | 0.02576                | 25.76                                          | 90         |

\*Rate constant per unit mass of Catalyst.
